# Supplementary material for: Protective Effects of ACF210, a Dual GLP-1/APJ Receptor Agonist, against Cardiovascular-Kidney-Metabolic Syndrome Induced by T2D
Source: Research Square preprint supplement (doi:10.21203/rs.3.rs-7782667/v1), 2025-10-17
Supplement: Supplementary file 1 [file 55f4bf5aa66d946de32fd2aa.docx]

**Supplementary material**

**1 Supplementary methods**

1.1 Design of ACF210

This invention introduces a novel bifunctional fusion protein named ACF210. This fusion protein ingeniously combines an Fc fragment, a GLP-1 peptide or its analog, and Elabela peptide fragment, a ligand for the APJ receptor. ACF210 is designed to simultaneously activate the GLP-1 receptor (GLP1R) and the APJ receptor, thereby exhibiting potential multi-effect therapeutic benefits. The core structure of ACF210 consists of an Fc fragment, with one end linked to a GLP-1 peptide or its analog and the other end connected to an Elabela peptide fragment (serving as a ligand for the APJ receptor). In specific embodiments, the N-terminus of the Fc fragment is connected to the GLP-1 peptide or its analog, while the C-terminus is linked to the Elabela peptide fragment. Additionally, the GLP-1 peptide or its analog and the Elabela peptide fragment can be connected to the Fc fragment through linker peptides, which are short peptide sequences that flexibly connect the two peptide sequences and typically range in length from 2 to 30 amino acids. For instance, linkers such as (G4S)3 can be employed, which are widely used in the construction of peptides in this field. In some designs of ACF210, the GLP-1 peptide or its analog is connected to the Fc fragment through a first linker peptide (linker1, as shown in Supplementary Table1, SEQ ID NO.1) with a specific amino acid sequence; whereas the Elabela peptide fragment is linked to the Fc fragment through a second linker peptide (linker2, as shown in Supplementary Table1, SEQ ID NO.2) with another specific amino acid sequence. These carefully designed linker peptides ensure the structural stability and functionality of the fusion protein. The choice of the Fc fragment is also crucial, as it can be derived from immunoglobulins such as IgA, IgD, IgE, IgG, or IgM. In the preferred embodiments of this invention, the Fc fragment is selected from IgG4, with its amino acid sequence as shown in Supplementary Table1, SEQ ID NO.3. This selection aims to provide a stable serum half-life and low immunogenicity. For the selection of GLP-1 analogs, this invention encompasses various known GLP-1 analogs, such as benaglutide, exenatide, liraglutide, lixisenatide, albiglutide, dulaglutide, and semaglutide. In specific embodiments, dulaglutide is preferred, with its amino acid sequence as shown in Supplementary Table1, SEQ ID NO.4. The Elabela peptide fragment is derived from the human Elabela gene, which encodes a precursor protein that can be processed to form mature peptide fragments of different lengths, including Elabela-32, Elabela-21, Elabela-14, and Elabela-11. In the design of ACF210, Elabela-21 is preferred, with its amino acid sequence as shown in Supplementary Table1, SEQ ID NO.5. This choice is based on the high efficiency of Elabela-21 in activating the APJ receptor. Furthermore, the design of ACF210 also considers the integration of a signal peptide. As a key element guiding proteins into the secretion pathway, the signal peptide plays an important role in the secretion and production of fusion proteins. In the embodiments of this invention, a signal peptide is connected to the GLP-1 peptide or its analog, with its sequence as shown in Supplementary Table1, SEQ ID NO.6. This signal peptide is derived from a specific protein, aiming to optimize the secretion efficiency of ACF210. Ultimately, the amino acid sequence and nucleotide sequence of ACF210 are shown in Supplementary Table1, SEQ ID NO.7 and Supplementary Table1, SEQ ID NO.8, respectively. This innovative bifunctional fusion protein not only provides new regulatory means for GLP-1 and APJ receptor-mediated signal transduction but also lays a solid foundation for the development of novel therapeutic drugs targeting various metabolic diseases.

1.2 Preparation of fusion protein ACF210

The preparation of fusion protein ACF210, as an existing technology, was completed by a third-party institution, WuXi Biologics. The DNA sequence of the ACF210 fusion protein molecule was cloned into the pcDNA™3.1 (+) (V79020, ThermoFisher) mammalian gene expression plasmid using DNA molecular cloning techniques. Following cloning, sequencing was performed to verify the accuracy of the sequence. Once the sequence was confirmed correct, large-scale plasmid preparation was carried out to obtain sufficient plasmid DNA. The plasmid was then transfected into CHO-K1 cells using polyethyleneimine (PEI) for massive expression of the fusion protein in these cells. The culture was expanded to 3 liters for transient expression of the recombinant protein. On the 11th day of culture, the supernatant was collected, with a protein concentration of 1.2 g/L in the supernatant. The supernatant was clarified by centrifugation at 10,000×g for 40 minutes and sterile-filtered through 0.45μm and 0.22μm filters. The filtered solution was purified using Protein A affinity chromatography (MabSelect SuRe resin, GE Healthcare Life Science) and SEC-HPLC. The SEC elution buffer was exchanged with a buffer containing 50 mM His, 125 mM Arg, at pH 5.5 to obtain the final product, which was tested to have a purity exceeding 98%. The obtained fusion protein was used for in vitro and in vivo experiments or for therapeutic purposes.

Supplementary Table1

| SEQ ID | Sequence (N-C) |
| --- | --- |
| NO.1 | GGGGGGGSGGGGSGGGGSA |
| NO.2 | GGGGGSGGGGSGGGGS |
| NO.3 | ESKYGPPCPPCPAPEFLGGPSVFLFPPKPKDTLMISRTPEVTCVVVDVSQEDPEVQFNWYVDGVEVHNAKTKPREEQFNSTYRVVSVLTVLHQDWLNGKEYKCKVSNKGLPSSIEKTISKAKGQPREPQVYTLPPSQEEMTKNQVSLTCLVKGFYPSDIAVEWESNGQPENNYKTTPPVLDSDGSFFLYSRLTVDKSRWQEGNVFSCSVMHEALHNHYTQKSLSLSL |
| NO.4 | HGEGTFTSDVSSYLEEQAAKEFIAWLVK |
| NO.5 | LRKHNCLQRRCMPLHSRVPFP |
| NO.6 | MGWSCIILFLVATATGVHS |
| NO.7 | MGWSCIILFLVATATGVHSHGEGTFTSDVSSYLEEQAAKEFIAWLVKGGGGGGGSGGGGSGGGGSAESKYGPPCPPCPAPEFLGGPSVFLFPPKPKDTLMISRTPEVTCVVVDVSQEDPEVQFNWYVDGVEVHNAKTKPREEQFNSTYRVVSVLTVLHQDWLNGKEYKCKVSNKGLPSSIEKTISKAKGQPREPQVYTLPPSQEEMTKNQVSLTCLVKGFYPSDIAVEWESNGQPENNYKTTPPVLDSDGSFFLYSRLTVDKSRWQEGNVFSCSVMHEALHNHYTQKSLSLSLGGGGGSGGGGSGGGGSLRKHNCLQRRCMPLHSRVPFP |
| NO.8 | ATGGGATGGTCATGTATCATCCTTTTTCTGGTAGCAACTGCAACTGGAGTACATAGCCATGGCGAAGGTACATTTACCTCTGACGTATCTTCGTACCTCGAAGAGCAGGCAGCTAAGGAGTTCATTGCATGGCTGGTCAAAGGTGGCGGAGGCGGCGGAGGTTCAGGTGGAGGCGGATCTGGAGGCGGCGGTTCTGCCGAATCAAAATACGGTCCACCTTGCCCACCATGCCCTGCTCCTGAGTTCCTTGGCGGCCCTAGCGTCTTCCTGTTCCCACCAAAGCCTAAGGACACCCTGATGATCTCCCGGACCCCTGAGGTCACATGCGTCGTAGTAGATGTTAGTCAGGAGGACCCCGAAGTCCAATTTAATTGGTACGTGGACGGTGTCGAGGTGCATAATGCCAAGACTAAACCTCGAGAGGAACAGTTCAATAGCACATACCGCGTGGTATCAGTGTTGACCGTCCTCCACCAAGACTGGTTGAACGGAAAAGAGTACAAGTGCAAGGTGTCCAATAAGGGACTGCCATCATCTATCGAGAAAACTATCTCCAAGGCTAAAGGTCAGCCTAGGGAGCCCCAGGTTTACACCCTGCCTCCCTCGCAAGAAGAGATGACTAAGAACCAGGTGTCTCTGACATGCCTGGTCAAAGGATTTTACCCATCTGACATTGCTGTTGAATGGGAAAGTAACGGACAGCCTGAGAACAACTACAAGACAACACCACCTGTACTGGATTCCGACGGCAGTTTCTTCCTGTATTCACGACTGACCGTTGACAAATCACGTTGGCAAGAGGGCAACGTCTTCTCCTGTAGCGTGATGCATGAGGCACTGCACAACCACTACACCCAAAAATCCTTGTCCCTGTCACTCGGTGGAGGTGGTGGCTCCGGCGGCGGTGGATCTGGCGGTGGCGGCAGTCTCCGTAAACACAACTGCCTGCAACGCCGTTGCATGCCATTGCATAGCCGAGTGCCTTTTCCCTAATAG |

**2 Supplementary Result**

**Establishment of type 2 diabetes mice model**

To confirm the successful establishment of the T2D model in mice induced by HFD and STZ, we measured the body weights at the end of the 8th week of HFD feeding. The body weight of the HFD+STZ mice increased to 32.97±2.1 g, compared to 28.9±1.2 g in chow-fed control mice (Supplementary Fig. 1A). The random blood glucose levels of HFD mice were also significantly higher than that in the chow-fed mice (Supplementary Fig. 1B). HFD+STZ model mice showed significant impaired glucose tolerance, as indicated by IPGTT (Supplementary Fig. 1C) and greater of the area under the curve (AUC) during the IPGTT compared with chow-fed mice or control mice (Supplementary Fig. 1D). In addition, IPITT showed that the blood glucose level of HFD+STZ mice dropped to the lowest level 60 min after injection of exogenous insulin, which was about 50% lower than that before injection, and the ability to maintain normal blood glucose was not significantly different from that of NC mice (Supplementary Fig. 1E). However, it can be seen from the AUC during the IPITT (Supplementary Fig. 1F) that the total blood glucose level of HFD+STZ mice was still higher than that of NC mice *(p* < 0.05). These results indicate that we have successfully established a T2D mice model.

**3 Supplementary Figure legend**

**Supplymentay Figure 1** Establishment of type 2 diabetes mice model

(A and B) Changes in body weight (A) and random blood glucose (B) in C57bl/6j mice during modeling. (C and D) IPGTT curves(C) and area under curve (D) of mice in high fat fed combined with STZ injection group and normal fed mice group before drug treatment. (E and F) IPITT curves(E) and area under curve (F) of mice in high fat fed combined with STZ injection group and normal fed mice group before drug treatment.**P* < 0.05; ***P* < 0.01; ****P* < 0.001.

**Supplymentay Figure 2**  Evaluation of ACF210 effects on glucose metabolism in type 2 diabetic mice

(A and B) Changes of food intake of C57bl/6j mice (A) and db/db mice (B) in each group during drug treatment. (C and D) Changes in body weight of C57bl/6j mice (C) and db/db mice (D) in each group during drug treatment. **P* < 0.05; ***P* < 0.01; ****P* < 0.001.

**Supplymentay Figure 3** Effect of ACF210 on cardiac function in diabetic mice.

A Comparison of LVEF in each group of mice at the end of intervention. n=6 animals per group, Data are shown as mean±SD and analyzed by unpaired Student t test. **P* < 0.05; ***P* < 0.01;****P* < 0.001, ns, non-significan.
